# Supplementary material for: Healthcare Providers’ Intention to Use Technology to Attend to Clients in Cape Coast Teaching Hospital, Ghana
Source: Hindawi journal article supplement (doi:10.1155/2021/5547544), 2021-01-01
Supplement: f1 [file 5547544.f1.pdf]

**UNIVERSITY OF CAPE COAST  
COLLEGE OF HEALTH AND ALLIED SCIENCES  
SCHOOL OF ALLIED HEALTH SCIENCES  
DEPARTMENT OF HEALTH INFORMATION MANAGEMENT**

**Assessment of Health Staffs' behavioural intention to use Lightwave Hospital Information Management System to attend to clients in Cape Coast Teaching Hospital**

**QUESTIONNAIRES FOR HEALTH STAFF**

**Introduction**

Good morning/afternoon. I am with the Department of Health Information Management, UCC. I will be conducting interviews with staff like you in CCTH to find out your views and ideas about **“Health Staffs’ behavioural intention to use Lightwave Hospital Information Management System (LHIMS) to attend to clients in Cape Coast Teaching Hospital”**. Your opinion is highly essential at the same time vital as it will help us to improve the kind of service we provide to our patients. Whatever you say will be treated confidential, so feel at ease to express your candid opinion. Be assured that your responses will not in any way be linked to your identity. You are kindly requested to answer the questions below by indicating a tick or writing the appropriate answer when needed.

You are a volunteer. You can choose not to take part and if you join, you may quit at any time. There will be no penalty if you decide to quit the study.

**THANK YOU**

| <b>Survey Variables and Codes</b> |                                               |                                            |             |
|-----------------------------------|-----------------------------------------------|--------------------------------------------|-------------|
| <b>SECTION I</b>                  |                                               |                                            |             |
| <b>Que</b>                        | <b>Variable</b>                               | <b>Value</b>                               | <b>Code</b> |
| 1                                 | Gender                                        | Female                                     | 1           |
|                                   |                                               | Male                                       | 2           |
| 2                                 | Age (years)                                   |                                            |             |
| 3                                 | Education                                     | 10 years                                   | 1           |
|                                   |                                               | Intermediate (11-12)                       | 2           |
|                                   |                                               | Bachelor (13-14)                           | 3           |
|                                   |                                               | Master                                     | 4           |
|                                   |                                               | Professional diploma/degree (specify)----- | 5           |
|                                   |                                               | Other (specify) -----                      | 6           |
| 4                                 | Working Experience (years)                    | 1                                          | 1           |
|                                   |                                               | 2                                          | 2           |
|                                   |                                               | 3                                          | 3           |
|                                   |                                               | 4+                                         | 4           |
| 5                                 | Title of the person filling the questionnaire | Doctor                                     | 1           |
|                                   |                                               | Pharmacist                                 | 2           |
|                                   |                                               | Medical Assistant                          | 3           |

| <b>Survey Variables and Codes</b>                                                                                                                                                                                                                                                                                                                                                                                                                                                                                                                                                                                                                              |                                                                                                |                                         |    |
|----------------------------------------------------------------------------------------------------------------------------------------------------------------------------------------------------------------------------------------------------------------------------------------------------------------------------------------------------------------------------------------------------------------------------------------------------------------------------------------------------------------------------------------------------------------------------------------------------------------------------------------------------------------|------------------------------------------------------------------------------------------------|-----------------------------------------|----|
|                                                                                                                                                                                                                                                                                                                                                                                                                                                                                                                                                                                                                                                                |                                                                                                | Nurse                                   | 4  |
|                                                                                                                                                                                                                                                                                                                                                                                                                                                                                                                                                                                                                                                                |                                                                                                | Midwife                                 | 5  |
|                                                                                                                                                                                                                                                                                                                                                                                                                                                                                                                                                                                                                                                                |                                                                                                | Community Nurse                         | 6  |
|                                                                                                                                                                                                                                                                                                                                                                                                                                                                                                                                                                                                                                                                |                                                                                                | Public Health Nurse                     | 7  |
|                                                                                                                                                                                                                                                                                                                                                                                                                                                                                                                                                                                                                                                                |                                                                                                | Nutrition Officer                       | 8  |
|                                                                                                                                                                                                                                                                                                                                                                                                                                                                                                                                                                                                                                                                |                                                                                                | Disease Control Officer                 | 9  |
|                                                                                                                                                                                                                                                                                                                                                                                                                                                                                                                                                                                                                                                                |                                                                                                | Health Information Officer              | 10 |
|                                                                                                                                                                                                                                                                                                                                                                                                                                                                                                                                                                                                                                                                |                                                                                                | Biostatistician                         | 11 |
|                                                                                                                                                                                                                                                                                                                                                                                                                                                                                                                                                                                                                                                                |                                                                                                | Dispensary Technician                   | 12 |
|                                                                                                                                                                                                                                                                                                                                                                                                                                                                                                                                                                                                                                                                |                                                                                                | Laboratory Technologist/Technician      | 13 |
|                                                                                                                                                                                                                                                                                                                                                                                                                                                                                                                                                                                                                                                                |                                                                                                | Other Facility Staff (specify)<br>..... | 14 |
| 6                                                                                                                                                                                                                                                                                                                                                                                                                                                                                                                                                                                                                                                              | Have you ever used LHIMS before in this facility?                                              | Never                                   | 1  |
|                                                                                                                                                                                                                                                                                                                                                                                                                                                                                                                                                                                                                                                                |                                                                                                | Once                                    | 2  |
|                                                                                                                                                                                                                                                                                                                                                                                                                                                                                                                                                                                                                                                                |                                                                                                | Two to three time                       | 3  |
|                                                                                                                                                                                                                                                                                                                                                                                                                                                                                                                                                                                                                                                                |                                                                                                | More than 3 times                       | 4  |
| 7                                                                                                                                                                                                                                                                                                                                                                                                                                                                                                                                                                                                                                                              | How often have you reviewed the LHIMS?                                                         | Not at all                              | 1  |
|                                                                                                                                                                                                                                                                                                                                                                                                                                                                                                                                                                                                                                                                |                                                                                                | About once each month                   | 2  |
|                                                                                                                                                                                                                                                                                                                                                                                                                                                                                                                                                                                                                                                                |                                                                                                | A few times a month                     | 3  |
|                                                                                                                                                                                                                                                                                                                                                                                                                                                                                                                                                                                                                                                                |                                                                                                | About once each week                    | 4  |
|                                                                                                                                                                                                                                                                                                                                                                                                                                                                                                                                                                                                                                                                |                                                                                                | A few times a week                      | 5  |
|                                                                                                                                                                                                                                                                                                                                                                                                                                                                                                                                                                                                                                                                |                                                                                                | Five to six times a week                | 6  |
|                                                                                                                                                                                                                                                                                                                                                                                                                                                                                                                                                                                                                                                                |                                                                                                | About once a day                        | 7  |
|                                                                                                                                                                                                                                                                                                                                                                                                                                                                                                                                                                                                                                                                |                                                                                                | Several times a day                     | 8  |
|                                                                                                                                                                                                                                                                                                                                                                                                                                                                                                                                                                                                                                                                |                                                                                                | Other                                   | 9  |
| 8                                                                                                                                                                                                                                                                                                                                                                                                                                                                                                                                                                                                                                                              | How often have you interacted with, or input data into the LHIMS?                              | Not at all                              | 1  |
|                                                                                                                                                                                                                                                                                                                                                                                                                                                                                                                                                                                                                                                                |                                                                                                | About once each month                   | 2  |
|                                                                                                                                                                                                                                                                                                                                                                                                                                                                                                                                                                                                                                                                |                                                                                                | A few times a month                     | 3  |
|                                                                                                                                                                                                                                                                                                                                                                                                                                                                                                                                                                                                                                                                |                                                                                                | About once each week                    | 4  |
|                                                                                                                                                                                                                                                                                                                                                                                                                                                                                                                                                                                                                                                                |                                                                                                | A few times a week                      | 5  |
|                                                                                                                                                                                                                                                                                                                                                                                                                                                                                                                                                                                                                                                                |                                                                                                | Five to six times a week                | 6  |
|                                                                                                                                                                                                                                                                                                                                                                                                                                                                                                                                                                                                                                                                |                                                                                                | About once a day                        | 7  |
|                                                                                                                                                                                                                                                                                                                                                                                                                                                                                                                                                                                                                                                                |                                                                                                | Several times a day                     | 8  |
|                                                                                                                                                                                                                                                                                                                                                                                                                                                                                                                                                                                                                                                                |                                                                                                | Other                                   | 9  |
| 9                                                                                                                                                                                                                                                                                                                                                                                                                                                                                                                                                                                                                                                              | After working with the LHIMS in this facility, how experienced would you judge yourself to be? | Low experience                          | 1  |
|                                                                                                                                                                                                                                                                                                                                                                                                                                                                                                                                                                                                                                                                |                                                                                                | Moderate experience                     | 2  |
|                                                                                                                                                                                                                                                                                                                                                                                                                                                                                                                                                                                                                                                                |                                                                                                | High experience                         | 3  |
| 10                                                                                                                                                                                                                                                                                                                                                                                                                                                                                                                                                                                                                                                             | With regard to technology in general, how would you describe yourself                          | Novice User                             | 1  |
|                                                                                                                                                                                                                                                                                                                                                                                                                                                                                                                                                                                                                                                                |                                                                                                | Intermediate User                       | 2  |
| <b>SECTION II</b>                                                                                                                                                                                                                                                                                                                                                                                                                                                                                                                                                                                                                                              |                                                                                                |                                         |    |
| We would like to know your opinion about how strongly you agree with certain activities carried out by you. There are no right or wrong answers, but only expression of your opinion on a scale. The scale is about assessing the intensity of your belief and ranges from strongly disagree (1) to strongly agree (7). You have to determine first whether you agree or disagree with the statement. Second decide about the intensity of agreement or disagreement. If you disagree with statement then use left side of the scale and determine how much disagreement that is – strongly disagree (1), somewhat disagree (2) or disagree (3) and circle the |                                                                                                |                                         |    |

| <b>Survey Variables and Codes</b>                                                                                                                                                                                                                                                                                                                                                                                                                                                                                                                                                                                                            |                                                                  |                     |   |
|----------------------------------------------------------------------------------------------------------------------------------------------------------------------------------------------------------------------------------------------------------------------------------------------------------------------------------------------------------------------------------------------------------------------------------------------------------------------------------------------------------------------------------------------------------------------------------------------------------------------------------------------|------------------------------------------------------------------|---------------------|---|
| <p>appropriate answer. If you are not sure of the intensity of belief or think that you neither disagree nor agree then circle 4. If you agree with the statement, then use right side of the scale and determine how much agreement that is – agree (5), somewhat agree (6) or strongly agree (7) and circle the appropriate answer. Please note that you might agree or disagree with all the statements and similarly you might not have the same intensity of agreement or disagreement and thus variations are expected in expressing your agreement or disagreement. We encourage you to express those variations in your beliefs.</p> |                                                                  |                     |   |
| 11                                                                                                                                                                                                                                                                                                                                                                                                                                                                                                                                                                                                                                           | I have a generally favourable attitude toward using LHIMS system | Strongly Agree      | 7 |
|                                                                                                                                                                                                                                                                                                                                                                                                                                                                                                                                                                                                                                              |                                                                  | Moderately Agree    | 6 |
|                                                                                                                                                                                                                                                                                                                                                                                                                                                                                                                                                                                                                                              |                                                                  | Slightly Agree      | 5 |
|                                                                                                                                                                                                                                                                                                                                                                                                                                                                                                                                                                                                                                              |                                                                  | Neutral             | 4 |
|                                                                                                                                                                                                                                                                                                                                                                                                                                                                                                                                                                                                                                              |                                                                  | Slightly Disagree   | 3 |
|                                                                                                                                                                                                                                                                                                                                                                                                                                                                                                                                                                                                                                              |                                                                  | Moderately Disagree | 2 |
|                                                                                                                                                                                                                                                                                                                                                                                                                                                                                                                                                                                                                                              |                                                                  | Strongly disagree   | 1 |
| 12                                                                                                                                                                                                                                                                                                                                                                                                                                                                                                                                                                                                                                           | Using the LHIMS enhanced my effectiveness in healthcare delivery | Strongly Agree      | 7 |
|                                                                                                                                                                                                                                                                                                                                                                                                                                                                                                                                                                                                                                              |                                                                  | Moderately Agree    | 6 |
|                                                                                                                                                                                                                                                                                                                                                                                                                                                                                                                                                                                                                                              |                                                                  | Slightly Agree      | 5 |
|                                                                                                                                                                                                                                                                                                                                                                                                                                                                                                                                                                                                                                              |                                                                  | Neutral             | 4 |
|                                                                                                                                                                                                                                                                                                                                                                                                                                                                                                                                                                                                                                              |                                                                  | Slightly Disagree   | 3 |
|                                                                                                                                                                                                                                                                                                                                                                                                                                                                                                                                                                                                                                              |                                                                  | Moderately Disagree | 2 |
|                                                                                                                                                                                                                                                                                                                                                                                                                                                                                                                                                                                                                                              |                                                                  | Strongly disagree   | 1 |
| 13                                                                                                                                                                                                                                                                                                                                                                                                                                                                                                                                                                                                                                           | I intend to use LHIMS during my encounter with patient/client    | Strongly Agree      | 7 |
|                                                                                                                                                                                                                                                                                                                                                                                                                                                                                                                                                                                                                                              |                                                                  | Moderately Agree    | 6 |
|                                                                                                                                                                                                                                                                                                                                                                                                                                                                                                                                                                                                                                              |                                                                  | Slightly Agree      | 5 |
|                                                                                                                                                                                                                                                                                                                                                                                                                                                                                                                                                                                                                                              |                                                                  | Neutral             | 4 |
|                                                                                                                                                                                                                                                                                                                                                                                                                                                                                                                                                                                                                                              |                                                                  | Slightly Disagree   | 3 |
|                                                                                                                                                                                                                                                                                                                                                                                                                                                                                                                                                                                                                                              |                                                                  | Moderately Disagree | 2 |
|                                                                                                                                                                                                                                                                                                                                                                                                                                                                                                                                                                                                                                              |                                                                  | Strongly disagree   | 1 |
| 14                                                                                                                                                                                                                                                                                                                                                                                                                                                                                                                                                                                                                                           | I believe it is a good idea to use LHIMS for healthcare delivery | Strongly Agree      | 7 |
|                                                                                                                                                                                                                                                                                                                                                                                                                                                                                                                                                                                                                                              |                                                                  | Moderately Agree    | 6 |
|                                                                                                                                                                                                                                                                                                                                                                                                                                                                                                                                                                                                                                              |                                                                  | Slightly Agree      | 5 |
|                                                                                                                                                                                                                                                                                                                                                                                                                                                                                                                                                                                                                                              |                                                                  | Neutral             | 4 |
|                                                                                                                                                                                                                                                                                                                                                                                                                                                                                                                                                                                                                                              |                                                                  | Slightly Disagree   | 3 |
|                                                                                                                                                                                                                                                                                                                                                                                                                                                                                                                                                                                                                                              |                                                                  | Moderately Disagree | 2 |
|                                                                                                                                                                                                                                                                                                                                                                                                                                                                                                                                                                                                                                              |                                                                  | Strongly disagree   | 1 |
| 15                                                                                                                                                                                                                                                                                                                                                                                                                                                                                                                                                                                                                                           | I intend to use the LHIMS as often as possible                   | Strongly Agree      | 7 |
|                                                                                                                                                                                                                                                                                                                                                                                                                                                                                                                                                                                                                                              |                                                                  | Moderately Agree    | 6 |
|                                                                                                                                                                                                                                                                                                                                                                                                                                                                                                                                                                                                                                              |                                                                  | Slightly Agree      | 5 |
|                                                                                                                                                                                                                                                                                                                                                                                                                                                                                                                                                                                                                                              |                                                                  | Neutral             | 4 |
|                                                                                                                                                                                                                                                                                                                                                                                                                                                                                                                                                                                                                                              |                                                                  | Slightly Disagree   | 3 |
|                                                                                                                                                                                                                                                                                                                                                                                                                                                                                                                                                                                                                                              |                                                                  | Moderately Disagree | 2 |
|                                                                                                                                                                                                                                                                                                                                                                                                                                                                                                                                                                                                                                              |                                                                  | Strongly disagree   | 1 |
| 16                                                                                                                                                                                                                                                                                                                                                                                                                                                                                                                                                                                                                                           | Learning to use the LHIMS interface was easy for me              | Strongly Agree      | 7 |
|                                                                                                                                                                                                                                                                                                                                                                                                                                                                                                                                                                                                                                              |                                                                  | Moderately Agree    | 6 |
|                                                                                                                                                                                                                                                                                                                                                                                                                                                                                                                                                                                                                                              |                                                                  | Slightly Agree      | 5 |
|                                                                                                                                                                                                                                                                                                                                                                                                                                                                                                                                                                                                                                              |                                                                  | Neutral             | 4 |
|                                                                                                                                                                                                                                                                                                                                                                                                                                                                                                                                                                                                                                              |                                                                  | Slightly Disagree   | 3 |

| Survey Variables and Codes |                                                                   |                     |   |
|----------------------------|-------------------------------------------------------------------|---------------------|---|
|                            |                                                                   | Moderately Disagree | 2 |
|                            |                                                                   | Strongly disagree   | 1 |
| 17                         | Using the LHIMS increased my productivity in my Work              | Strongly Agree      | 7 |
|                            |                                                                   | Moderately Agree    | 6 |
|                            |                                                                   | Slightly Agree      | 5 |
|                            |                                                                   | Neutral             | 4 |
|                            |                                                                   | Slightly Disagree   | 3 |
|                            |                                                                   | Moderately Disagree | 2 |
|                            |                                                                   | Strongly disagree   | 1 |
| 18                         | The LHIMS user interface was clear and understandable             | Strongly Agree      | 7 |
|                            |                                                                   | Moderately Agree    | 6 |
|                            |                                                                   | Slightly Agree      | 5 |
|                            |                                                                   | Neutral             | 4 |
|                            |                                                                   | Slightly Disagree   | 3 |
|                            |                                                                   | Moderately Disagree | 2 |
|                            |                                                                   | Strongly disagree   | 1 |
| 19                         | Using the LHIMS enabled me to accomplish tasks more quickly       | Strongly Agree      | 7 |
|                            |                                                                   | Moderately Agree    | 6 |
|                            |                                                                   | Slightly Agree      | 5 |
|                            |                                                                   | Neutral             | 4 |
|                            |                                                                   | Slightly Disagree   | 3 |
|                            |                                                                   | Moderately Disagree | 2 |
|                            |                                                                   | Strongly disagree   | 1 |
| 20                         | It was easy for me to become skilful at using the LHIMS interface | Strongly Agree      | 7 |
|                            |                                                                   | Moderately Agree    | 6 |
|                            |                                                                   | Slightly Agree      | 5 |
|                            |                                                                   | Neutral             | 4 |
|                            |                                                                   | Slightly Disagree   | 3 |
|                            |                                                                   | Moderately Disagree | 2 |
|                            |                                                                   | Strongly disagree   | 1 |
| 21                         | Using the LHIMS system provided me with a lot of enjoyment        | Strongly Agree      | 7 |
|                            |                                                                   | Moderately Agree    | 6 |
|                            |                                                                   | Slightly Agree      | 5 |
|                            |                                                                   | Neutral             | 4 |
|                            |                                                                   | Slightly Disagree   | 3 |
|                            |                                                                   | Moderately Disagree | 2 |
|                            |                                                                   | Strongly disagree   | 1 |
| 22                         | I plan to use the LHIMS in the future                             | Strongly Agree      | 7 |
|                            |                                                                   | Moderately Agree    | 6 |
|                            |                                                                   | Slightly Agree      | 5 |
|                            |                                                                   | Neutral             | 4 |
|                            |                                                                   | Slightly Disagree   | 3 |
|                            |                                                                   | Moderately Disagree | 2 |
|                            |                                                                   | Strongly disagree   | 1 |
| 23                         | I expect my use of LHIMS to continue in the future                | Strongly Agree      | 7 |
|                            |                                                                   | Moderately Agree    | 6 |
|                            |                                                                   | Slightly Agree      | 5 |

| Survey Variables and Codes |                                                             |                     |   |
|----------------------------|-------------------------------------------------------------|---------------------|---|
|                            |                                                             | Neutral             | 4 |
|                            |                                                             | Slightly Disagree   | 3 |
|                            |                                                             | Moderately Disagree | 2 |
|                            |                                                             | Strongly disagree   | 1 |
| 24                         | I found using the LHIMS useful                              | Strongly Agree      | 7 |
|                            |                                                             | Moderately Agree    | 6 |
|                            |                                                             | Slightly Agree      | 5 |
|                            |                                                             | Neutral             | 4 |
|                            |                                                             | Slightly Disagree   | 3 |
|                            |                                                             | Moderately Disagree | 2 |
|                            |                                                             | Strongly disagree   | 1 |
| 25                         | Overall, I enjoyed using the LHIMS                          | Strongly Agree      | 7 |
|                            |                                                             | Moderately Agree    | 6 |
|                            |                                                             | Slightly Agree      | 5 |
|                            |                                                             | Neutral             | 4 |
|                            |                                                             | Slightly Disagree   | 3 |
|                            |                                                             | Moderately Disagree | 2 |
|                            |                                                             | Strongly disagree   | 1 |
| 26                         | I found the LHIMS interface to be flexible to interact with | Strongly Agree      | 7 |
|                            |                                                             | Moderately Agree    | 6 |
|                            |                                                             | Slightly Agree      | 5 |
|                            |                                                             | Neutral             | 4 |
|                            |                                                             | Slightly Disagree   | 3 |
|                            |                                                             | Moderately Disagree | 2 |
|                            |                                                             | Strongly disagree   | 1 |
